# Supplementary material for: Optimizing the performance of the near-infrared (NIR) photothermal conversion via modulating the domain size of the chiral nematic phase in co-assembled cellulose nanocrystal composite films
Source: Royal Society of Chemistry journal article supplement (doi:10.1039/d2tc02403a), 2022-01-01
Supplement: d2tc02403a1.pdf [file d2tc02403a1.pdf]

# Optimizing the performance of the near-infrared (NIR) photothermal conversion via modulating the domain size of chiral nematic phase in the co-assembled cellulose nanocrystals composite films

Kai Feng, Guodan Wei, Mengfan Lu, Naiwei Gao, Yapei Wang and Zhaoxia Jin\*

Key Laboratory of Advanced Light Conversion Materials and Biophotonics,  
Department of Chemistry, Renmin University of China, 100872 Beijing, People's  
Republic of China

\*Email: jinzx@ruc.edu.cn

## Content

### Figures

|                                                                                                                                                                                                      |    |
|------------------------------------------------------------------------------------------------------------------------------------------------------------------------------------------------------|----|
| <b>Fig. S1</b> The vis-NIR transmittance spectra (a) and CD spectra (b) of pure CNCs and CP <sub>x</sub> composite films.....                                                                        | S4 |
| <b>Fig. S2</b> Cross-sectional SEM images of (a) CP <sub>1</sub> ; (b) CP <sub>2</sub> ; (c) CP <sub>3</sub> ; (d) CP <sub>4</sub> , (e) CP <sub>5</sub> and (f) CP <sub>6</sub> composite film..... | S5 |
| <b>Fig. S3</b> The magnified cross-sectional SEM images of (a) CP <sub>5</sub> and (b) CP <sub>6</sub> compositefilm.....                                                                            | S6 |
| <b>Fig. S4</b> UV-vis-NIR absorption spectrum of pure PEDOT: PSS film.....                                                                                                                           | S7 |
| <b>Fig. S5</b> The surface temperature of CP <sub>x</sub> composite films induced by NIR light irradiation (750 nm) under different power.....                                                       | S8 |
| <b>Fig. S6</b> The surface temperature of CP <sub>x</sub> film increases and decreases through alternatively turn-on and turn-off light irradiation under different power. (a) CP <sub>1</sub> ; (b) |    |

CP<sub>2</sub>; (c) CP<sub>3</sub>; (d) CP<sub>4</sub>; (e) CP<sub>5</sub>; (f) CP<sub>6</sub> composite film.....S9

**Fig. S7** A linear fitting correlation between cooling period ( $t$ ) and  $-\ln\theta$  with an  $R$ -squared value of over 0.99.  $\theta$  refers to the ratio of  $\Delta T$  to  $\Delta T_{max}$ .....S10

**Fig. S8** The cross-sectional SEM image of (a) HPC/PEDOT: PSS/OS/TA with 3.43 wt.% PEDOT; (c) PVP/PEDOT: PSS/OS/TA with 3.43 wt.% PEDOT; POM image of (b) HPC/PEDOT: PSS/OS/TA with 3.43 wt.% PEDOT; (d) PVP/PEDOT: PSS/OS/TA with 3.43 wt.% PEDOT.....S11

**Fig. S9** The increase and decrease of the surface temperature of pure PEDOT: PSS film through alternative turn-on and turn-off light irradiation under different power.....S1

2

**Fig. S10** POM images of (a) CNCs/PEDOT: PSS/OS and (b) CNCs/PEDOT: PSS/TA film.....S13

**Fig. S11** POM image of pure CNCs film.....S14

**Fig. S12** POM image of CP<sub>6</sub> composite film.....S15

**Fig. S13** POM images of CNCs/PEDOT: PSS composite films with the mass ratio of (a) CNCs : (PEDOT: PSS) = 95:5; (b) CNCs : (PEDOT: PSS) = 80:20.....S16

**Fig. S14** (a) POM image of pure CNCs (b.d.) film. (b) The cross-sectional SEM image of pure CNCs (b.d.) film.....S17

**Fig. S15** The comparison of temperature changes of CP<sub>x</sub> composite films (the red line) and CP<sub>x</sub> (b.d.) films (the black line) with different PEDOT: PSS contents, under the 1.5 W light radiation (750 nm laser).....S18

## Tables

**Table S1** Sample codes of CP<sub>x</sub> composite films.....S19

**Table S2** The compositions of CNCs/PEDOT: PSS, CNCs/PEDOT: PSS/OS, CNCs/PEDOT: PSS/TA, PEDOT: PSS/OS/TA, HPC/PEDOT: PSS/OS/TA, PVP/PEDOT: PSS/OS/TA, and CNCs(b.d.)/PEDOT: PSS/OS/TA composite films.....S20

**Table S3** NIR photothermal conversion efficiency ( $\eta_{PT}$ ) of pure PEDOT: PSS and CP<sub>x</sub> composite films.....S22

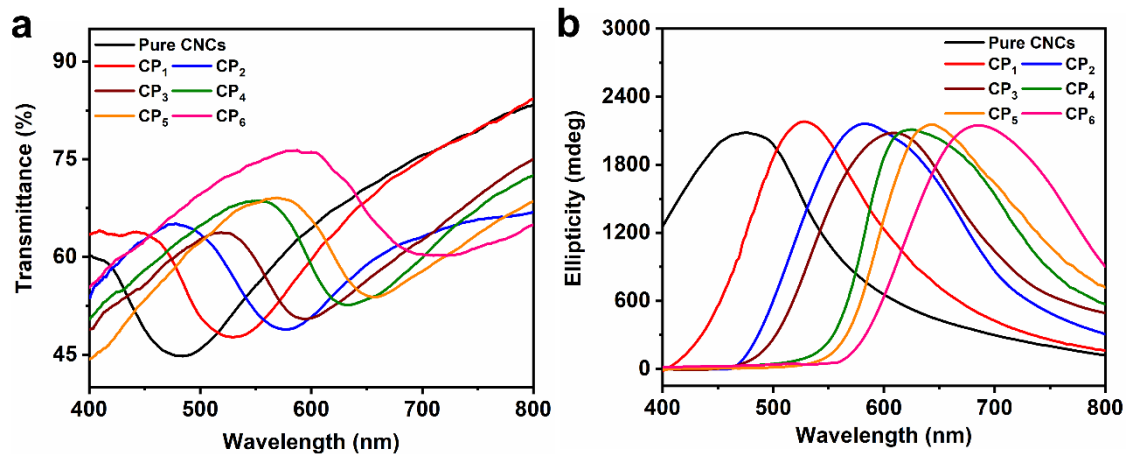

**Fig. S1** The vis-NIR transmittance spectra (a) and CD spectra (b) of pure CNCs and CP<sub>x</sub> composite films.

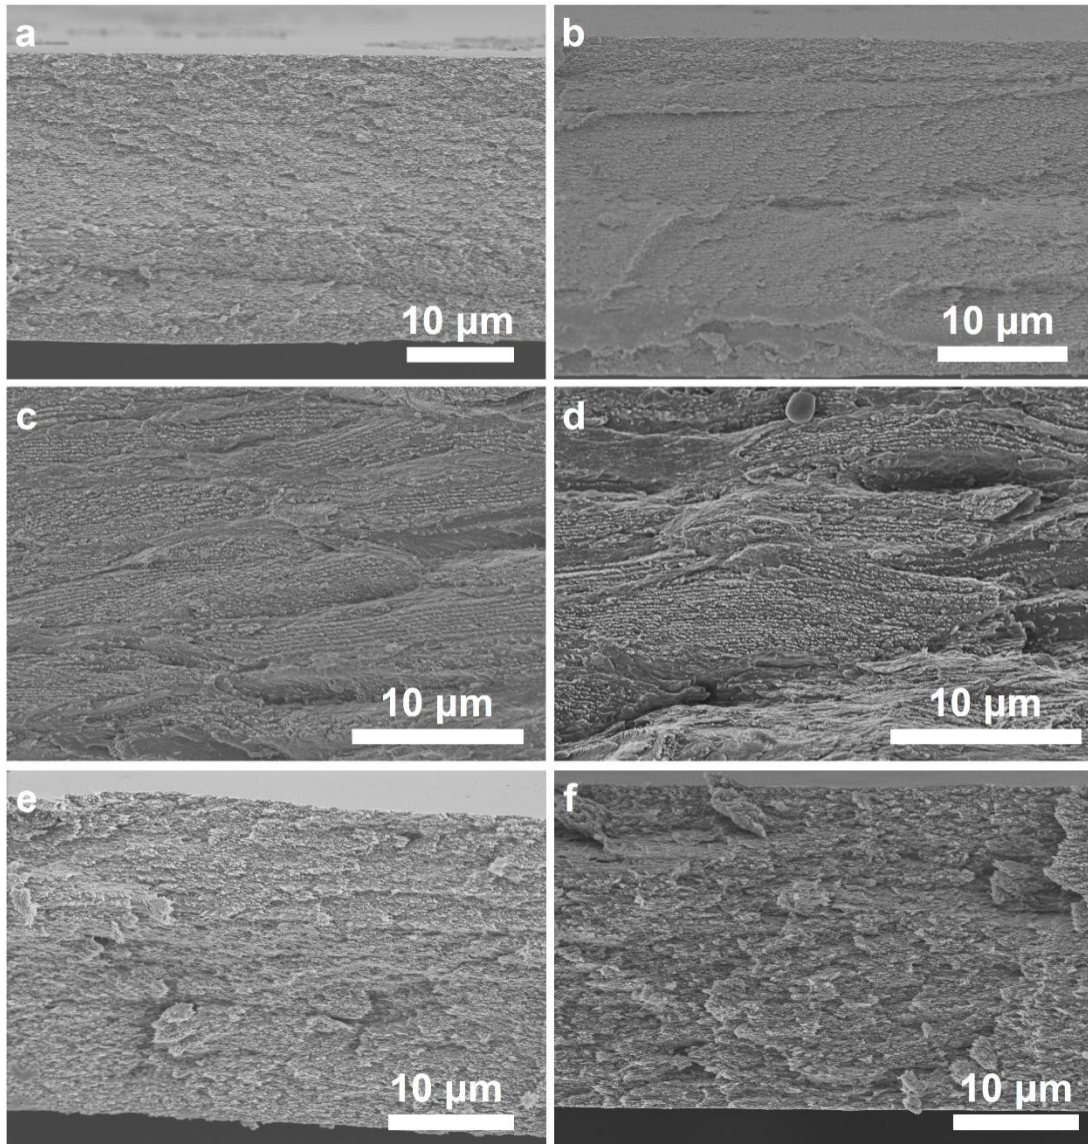

**Fig. S2** Cross-sectional SEM images of (a) CP<sub>1</sub>; (b) CP<sub>2</sub>; (c) CP<sub>3</sub>; (d) CP<sub>4</sub>, (e) CP<sub>5</sub> and (f) CP<sub>6</sub> composite film.

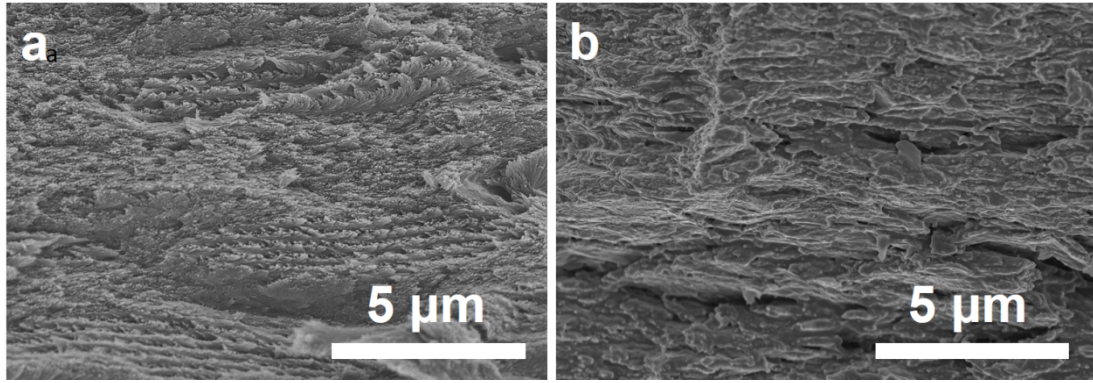

**Fig. S3** The magnified cross-sectional SEM images of (a) CP<sub>5</sub> and (b) CP<sub>6</sub> composite film.

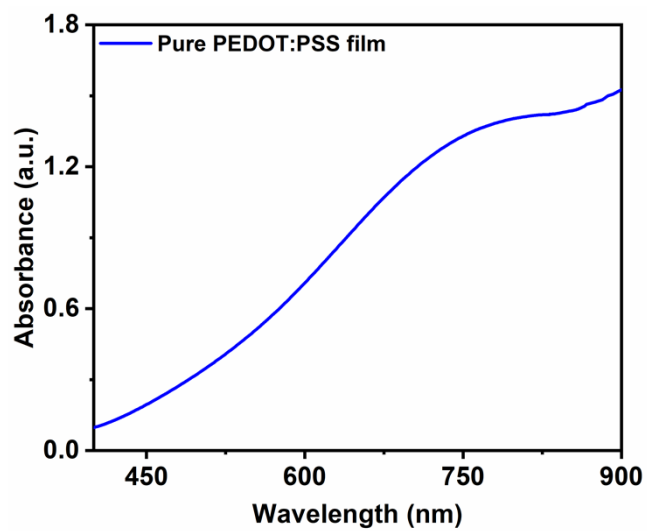

**Fig. S4** UV-vis-NIR absorption spectrum of pure PEDOT: PSS film.

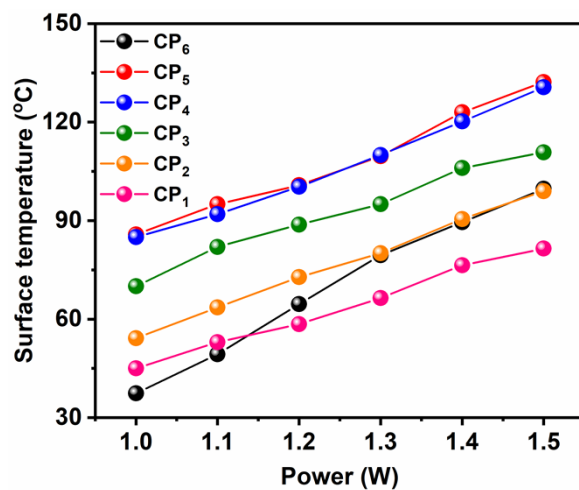

**Fig. S5** The surface temperature of CP<sub>x</sub> composite films induced by NIR light irradiation (750 nm) under different power of light.



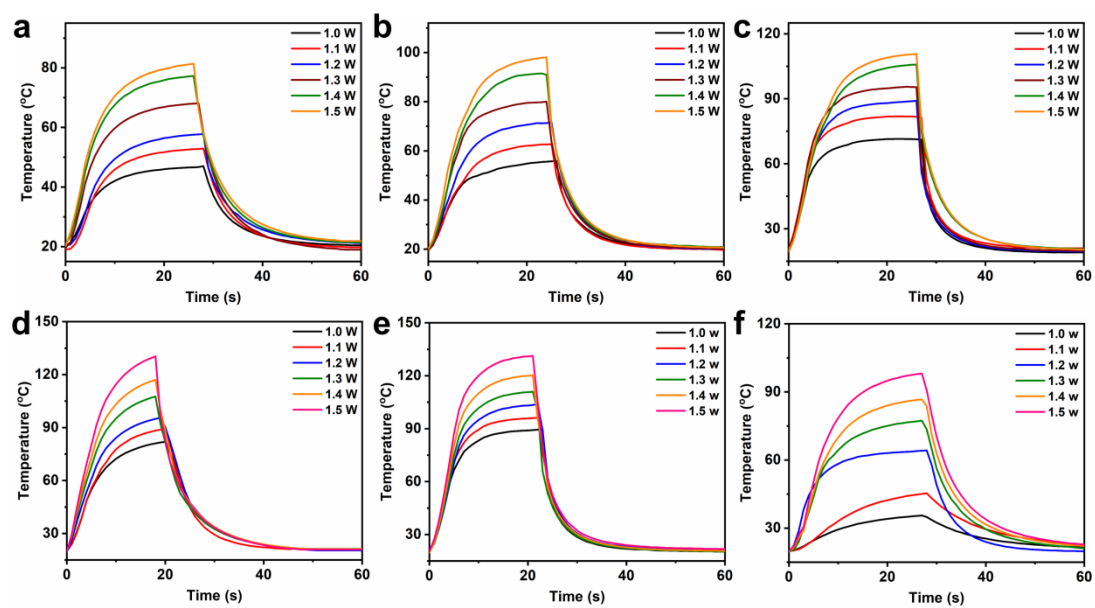

**Fig. S6** The surface temperature of CP<sub>x</sub> film increases and decreases through alternatively turn-on and turn-off light irradiation under different power. (a) CP<sub>1</sub>; (b) CP<sub>2</sub>; (c) CP<sub>3</sub>; (d) CP<sub>4</sub>; (e) CP<sub>5</sub>; (f) CP<sub>6</sub> composite film.

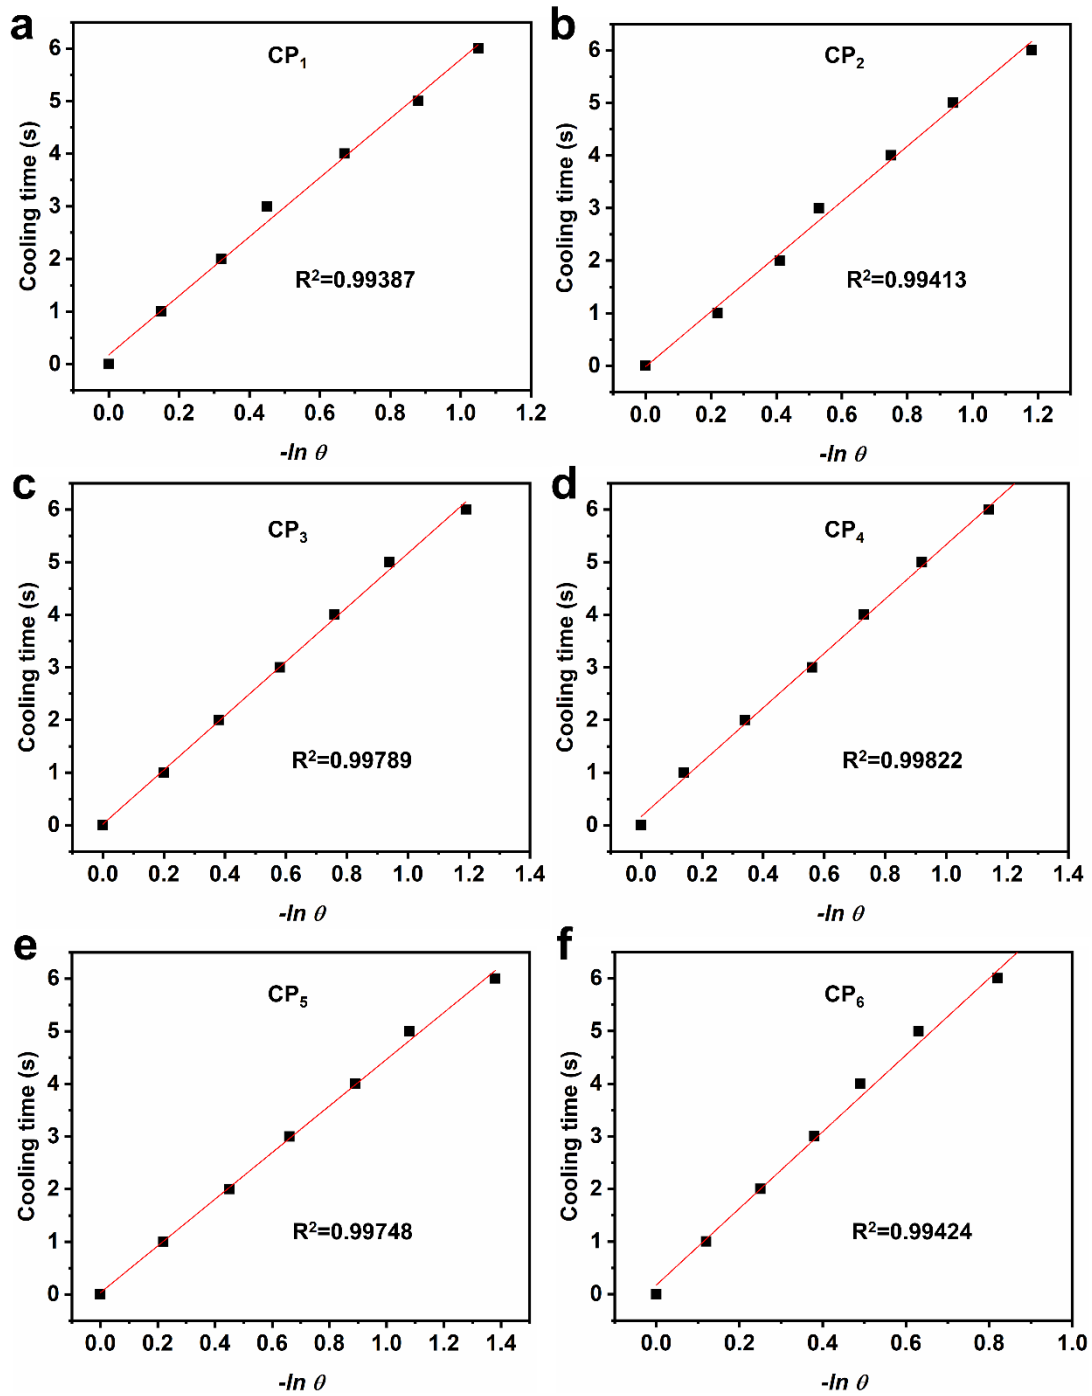

**Fig. S7** A linear fitting correlation between cooling period ( $t$ ) and  $-\ln \theta$  with an  $R$ -squared value of over 0.99.  $\theta$  refers to the ratio of  $\Delta T$  to  $\Delta T_{max}$ .

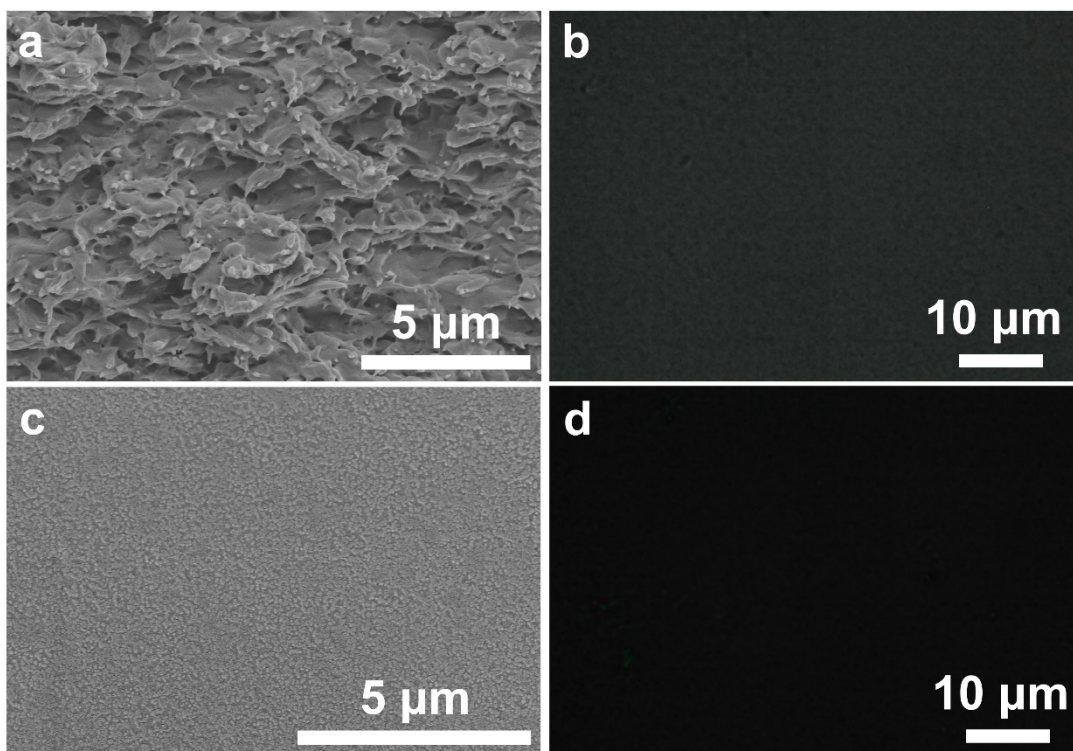

**Fig. S8** Characterizations of HPC/PEDOT: PSS/OS/TA (a, b) and PVP/PEDOT: PSS/OS/TA (c, d). Both samples contained 3.43 wt.% PEDOT. (a, c) The cross-sectional SEM images. (b, d) POM images. These images confirmed that there was no chiral nematic nanostructure in these composite films.

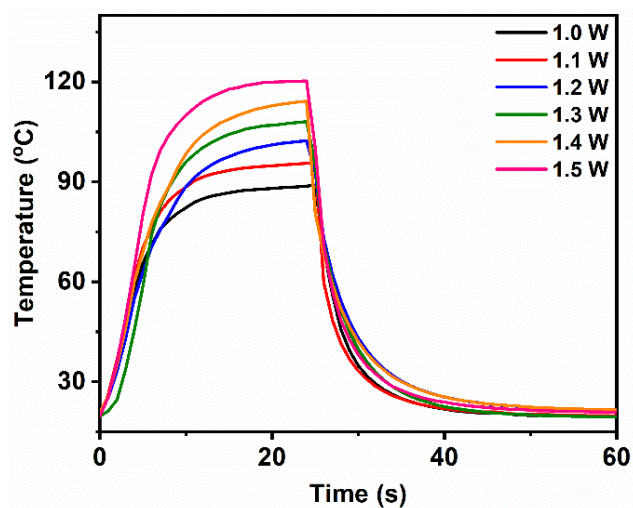

**Fig. S9** The increase and decrease of the surface temperature of pure PEDOT: PSS film through alternative turn-on and turn-off light irradiation under different power.

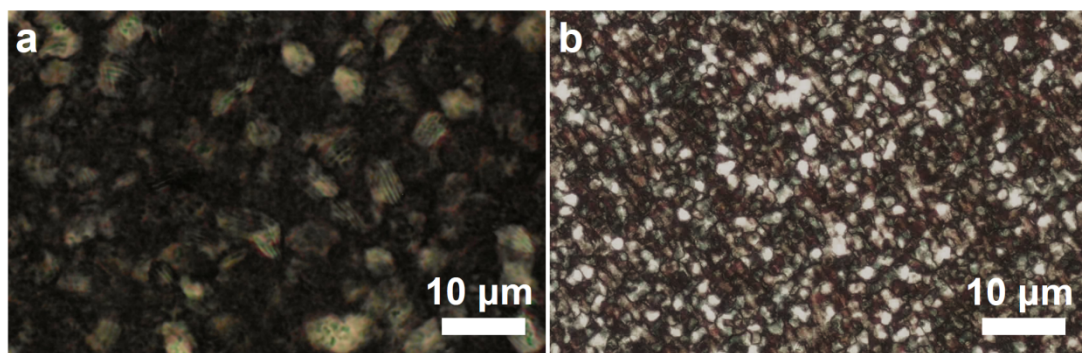

**Fig. S10** POM images of (a) CNCs/PEDOT: PSS/OS and (b) CNCs/PEDOT: PSS/TA film.

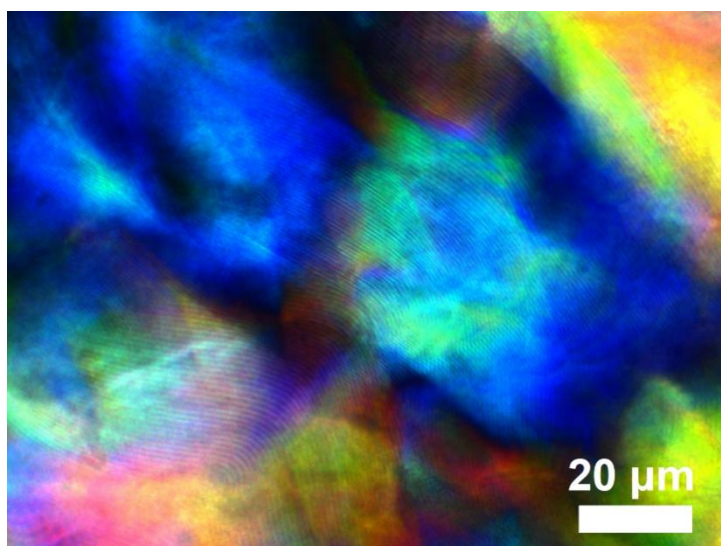

**Fig. S11** POM image of pure CNCs film.

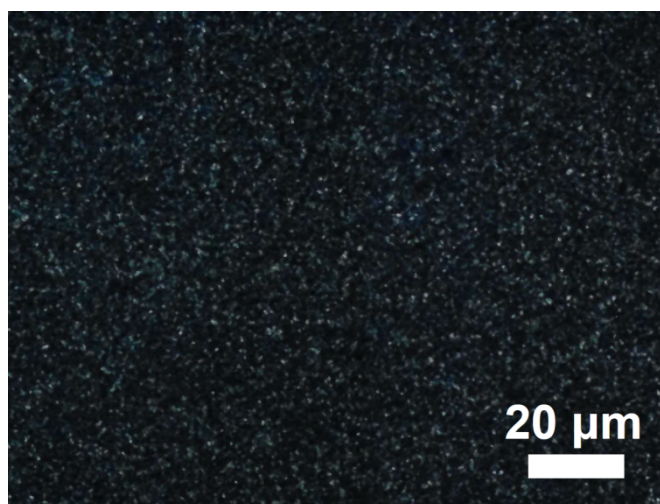

**Fig. S12** POM image of CP<sub>6</sub> composite film.

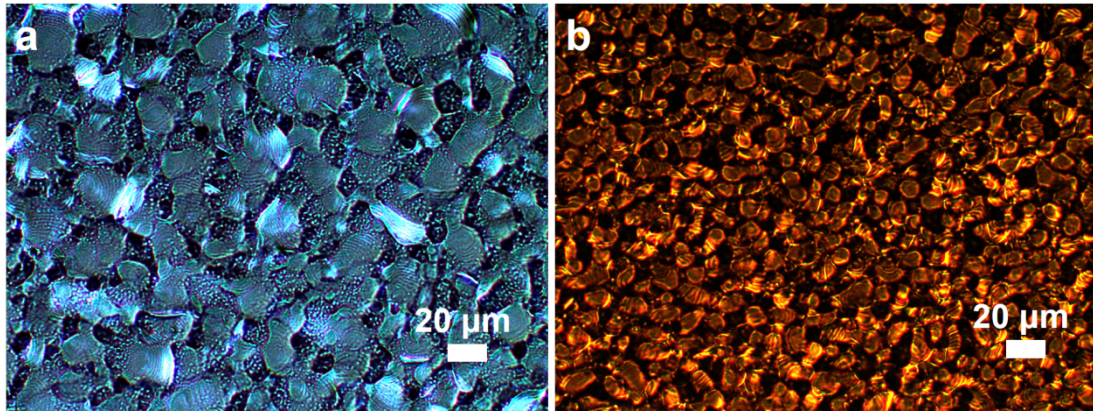

**Fig. S13** POM images of CNCs/PEDOT: PSS composite films with the mass ratio of (a) CNCs : (PEDOT: PSS) = 95:5; (b) CNCs : (PEDOT: PSS) = 80:20.



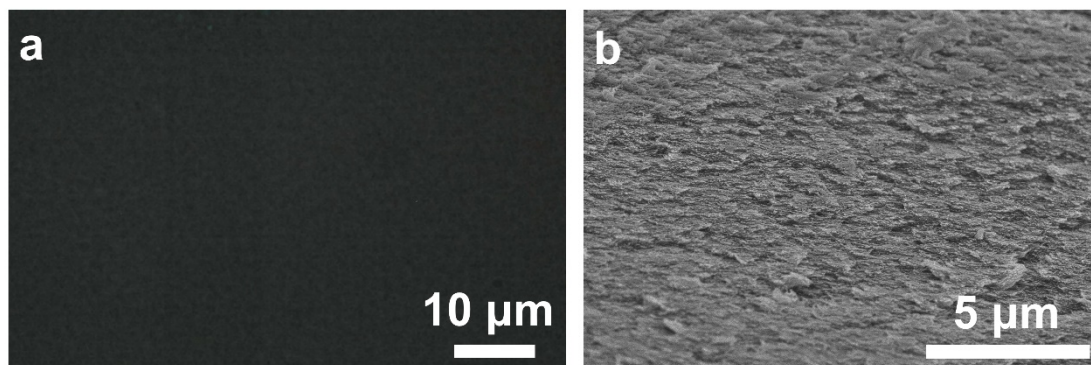

**Fig. S14** (a) POM image of pure CNCs (b.d.) film. (b) The cross-sectional SEM image of pure CNCs (b.d.) film.

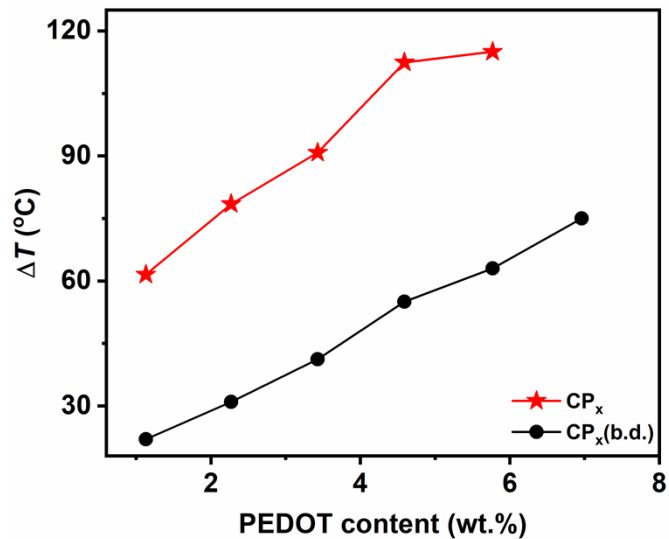

**Fig. S15** The comparison of temperature changes of  $CP_x$  composite films (the red line) and  $CP_x$  (b.d.) films (the black line) with different PEDOT: PSS contents, under the 1.5 W light radiation (750 nm laser).

**Table S1** Sample codes of CP<sub>x</sub> composite films.

| Sample codes    | Weight ratio                                        |
|-----------------|-----------------------------------------------------|
|                 | CNCs : (PEDOT:PSS) : OS : (TA + zonyl) <sup>a</sup> |
| CP <sub>1</sub> | 75.19 : 3.96 : 8.35 : 12.50                         |
| CP <sub>2</sub> | 71.60 : 7.95 : 7.95 : 12.50                         |
| CP <sub>3</sub> | 67.96 : 11.99 : 7.55 : 12.50                        |
| CP <sub>4</sub> | 64.29 : 16.07 : 7.14 : 12.50                        |
| CP <sub>5</sub> | 60.58 : 20.19 : 6.73 : 12.50                        |
| CP <sub>6</sub> | 56.83 : 24.36 : 6.31 : 12.50                        |

<sup>a</sup> The ratios of TA and zonyl were kept at 10 % and 2.5 %, respectively.

**Table S2** The compositions of CNCs/PEDOT: PSS, CNCs/PEDOT: PSS/OS, CNCs/PEDOT: PSS/TA, PEDOT: PSS/OS/TA, HPC/PEDOT: PSS/OS/TA, PVP/PEDOT: PSS/OS/TA and CNCs(b.d.)/PEDOT: PSS/OS/TA composite films.

| Sample             | Weight ratio                          |
|--------------------|---------------------------------------|
| CNCs/PEDOT: PSS    | CNCs : (PEDOT: PSS)                   |
|                    | 93.54 : 3.96                          |
|                    | 89.55 : 7.95                          |
|                    | 85.51 : 11.99                         |
|                    | 81.43 : 16.07                         |
|                    | 77.31 : 20.19                         |
| CNCs/PEDOT: PSS/OS | CNCs : (PEDOT: PSS) : OS <sup>a</sup> |
|                    | 84.19 : 3.96 : 9.35                   |
|                    | 80.60 : 7.95 : 8.95                   |
|                    | 76.96 : 11.99 : 8.55                  |
|                    | 73.29 : 16.07 : 8.14                  |
|                    | 69.58 : 20.19 : 7.73                  |
| CNCs/PEDOT: PSS/TA | CNCs : (PEDOT: PSS) : TA <sup>a</sup> |
|                    | 83.54 : 3.96 : 10                     |
|                    | 79.55 : 7.95 : 10                     |
|                    | 75.51 : 11.99 : 10                    |

|                                          |                                              |
|------------------------------------------|----------------------------------------------|
|                                          | 71.43 : 16.07 : 10                           |
|                                          | 67.31 : 20.19 : 10                           |
| PEDOT: PSS/OS/TA                         | (PEDOT: PSS) : OS : TA : Zonyl               |
|                                          | 15.96 : 33.66 : 40.31 : 10.07                |
|                                          | 27.99 : 27.99 : 35.21 : 8.81                 |
|                                          | 37.42 : 23.56 : 31.21 : 7.81                 |
|                                          | 45.00 : 19.99 : 28.00 : 7.01                 |
|                                          | 51.22 : 17.07 : 25.37 : 6.34                 |
| HPC (or PVP, CNCs(b.d))/PEDOT: PSS/OS/TA | HPC (or PVP, CNC(b.d)) : (PEDOT: PSS) : OS : |
|                                          | TA <sup>a</sup>                              |
|                                          | 75.19 : 3.96 : 8.35 : 10                     |
|                                          | 71.60 : 7.95 : 7.95 : 10                     |
|                                          | 67.96 : 11.99 : 7.55 : 10                    |
|                                          | 64.29 : 16.07 : 7.14 : 10                    |
|                                          | 60.58 : 20.19 : 6.73 : 10                    |

<sup>a</sup>: The zonyl content was kept at 2.5% if not specified.

**Table S3** NIR photothermal conversion efficiency ( $\eta_{PT}$ ) of pure PEDOT: PSS and CP<sub>x</sub> composite films.

| Samples           | PEDOT content<br>(wt.%) | $\eta_{PT}$<br>(%) |
|-------------------|-------------------------|--------------------|
| (Pure PEDOT: PSS) | 28.57                   | 68.7               |
| CP <sub>1</sub>   | 1.13                    | 71.2               |
| CP <sub>2</sub>   | 2.27                    | 73.8               |
| CP <sub>3</sub>   | 3.43                    | 77.0               |
| CP <sub>4</sub>   | 4.59                    | 77.0               |
| CP <sub>5</sub>   | 5.77                    | 77.6               |
| CP <sub>6</sub>   | 6.96                    | 64.2               |
